# Supplementary material
Source: MDPI journal article supplement (https://www.mdpi.com/2227-9040/10/7/268)
Supplement: s1 [file s1]

---

## Supporting Information

# An Enzyme-Free Photoelectrochemical Sensor Platform for Ascorbic Acid Detection in Human Urine

Zhengzheng Zhao<sup>#1</sup>, Dongfang Han<sup>#1</sup>, Ren Xiao<sup>1</sup>, Tianqi Wang<sup>1</sup>, Zhishan Liang<sup>1</sup>, Zhifang Wu<sup>1</sup>, Fangjie Han<sup>1</sup>, Dongxue Han<sup>1,2,\*</sup>, Yingming Ma<sup>1,\*</sup> and Li Niu<sup>1</sup>

<sup>1</sup> *Guangzhou Key Laboratory of Sensing Materials & Devices, Center for Advanced Analytical Science, School of Chemistry and Chemical Engineering, Guangzhou University, Guangzhou 510006, P. R. China.*

<sup>2</sup> *Guangdong Provincial Key Laboratory of Psychoactive Substances Monitoring and Safety, Anti-Drug Technology Center of Guangdong Province, Guangzhou 510230, P.R. China.*

<sup>\*</sup> *Corresponding author at: Guangzhou Key Laboratory of Sensing Materials & Devices, Center for Advanced Analytical Science, School of Chemistry and Chemical Engineering, Guangzhou University, Guangzhou 510006, P. R. China. E-mail address: dxhan@gzhu.edu.cn (Dongxue Han), ccymma@gzhu.edu.cn (Yingming Ma)*

<sup>\*</sup> *Guangdong Provincial Key Laboratory of Psychoactive Substances Monitoring and Safety, Anti-Drug Technology Center of Guangdong Province, Guangzhou 510230, PR China. E-mail address: dxhan@gzhu.edu.cn (Dongxue Han).*

<sup>#</sup> *These authors contributed equally to this paper.*

## 1.1 Surface morphology analysis for Dy-OSCN

**Table S1.** High resolution projected electron microscope electron energy spectrum (HRTEM-EDS) element total distribution table of Dy-OSCN/FTO photoelectric detection electrode calcined at 400 °C.

| Element       | Line system | Absorption correction | wt%    | wt% Sigma |
|---------------|-------------|-----------------------|--------|-----------|
| C             | K           | 1.00                  | 31.57  | 0.50      |
| N             | K           | 1.00                  | 2.84   | 0.46      |
| O             | K           | 1.00                  | 16.17  | 0.35      |
| S             | K           | 1.00                  | 3.77   | 0.14      |
| Dy            | L           | 1.00                  | 45.66  | 0.53      |
| <b>Total:</b> |             |                       | 100.00 |           |

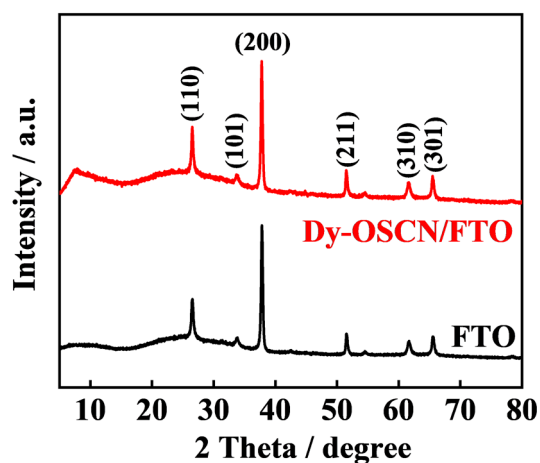

**Figure S1.** X-ray diffraction (XRD) images of Dy-OSCN/FTO and FTO electrode.

## 1.2 The results of conditions optimization

**Table S2.** Optimized conditions of the calcination temperature of Dy-OSCN /FTO electrode.

| R <sup>2</sup> | 420nm   | 465nm   | 535nm   | 630nm   |
|----------------|---------|---------|---------|---------|
| 300°C          | 0.91564 | 0.87329 | 0.93342 | 0.97136 |
| 400°C          | 0.90823 | 0.98945 | 0.96401 | 0.97667 |

|       |        |         |         |         |
|-------|--------|---------|---------|---------|
| 500°C | 0.8246 | 0.82379 | 0.81139 | 0.89459 |
|-------|--------|---------|---------|---------|

**Table S3.** Optimized conditions of the excitation wavelength of Dy-OSCN /FTO electrode.

| Added 20μM | 420nm   | 465nm    | 535nm    | 630nm    |
|------------|---------|----------|----------|----------|
| 300°C      | -0.0015 | -0.0015  | -0.0034  | -0.0108  |
| 400°C      | -0.0061 | -0.0157  | -0.0052  | -0.00799 |
| 500°C      | 0.00123 | 8.30E-04 | 7.50E-04 | -0.0018  |

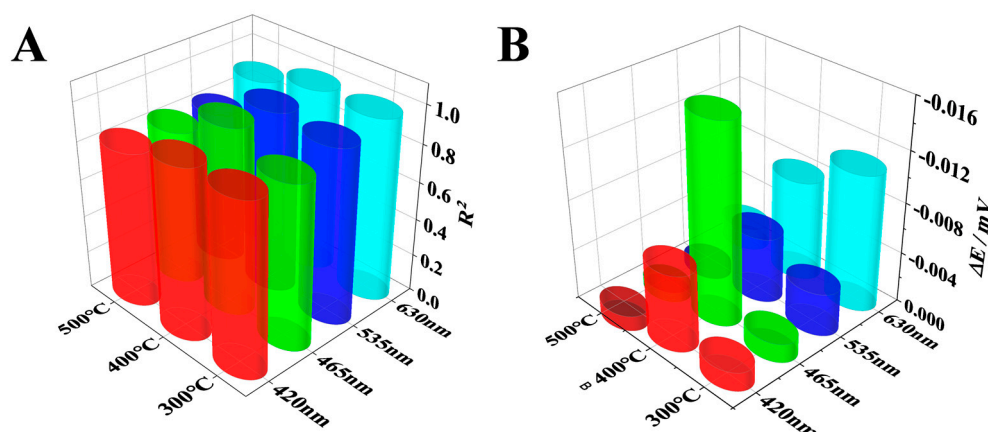

**Figure S2.** (A) Linear ( $R^2$ ) comparison and (B) low concentration signal intensity of AA tests with Dy-OSCN/FTO electrodes at calcination temperatures of 300 °C, 400 °C and 500 °C under 10 W LED light excitation at 630 nm, 535 nm, 465 nm and 420 nm.

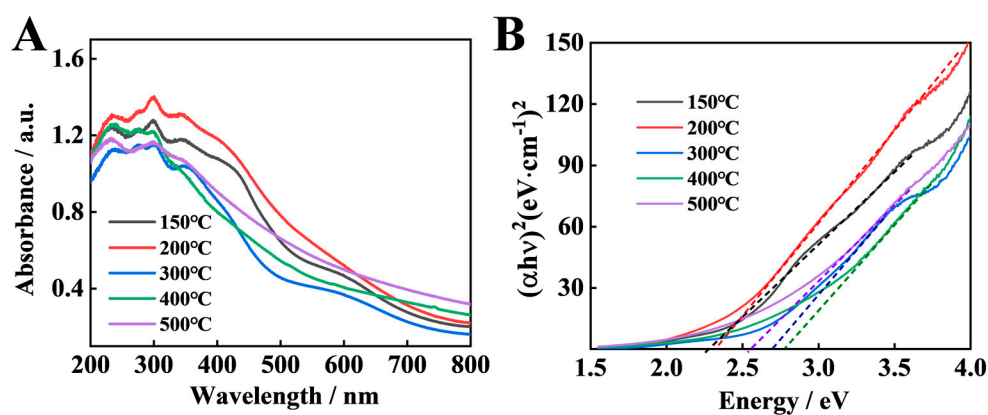

**Figure S3.** (A) UV diffuse reflectometry of Dy-OSCN/FTO electrode at calcination

temperatures of 150 °C, 200 °C, 300 °C, 400 °C and 500 °C; (B) Kubelka-Munk curves of Dy-OSCN/FTO photoelectric detection electrodes at calcination temperatures of 150 °C, 200 °C, 300 °C, 400 °C and 500 °C.

### 1.3 The performance of the Dy-OSCN PEC sensor

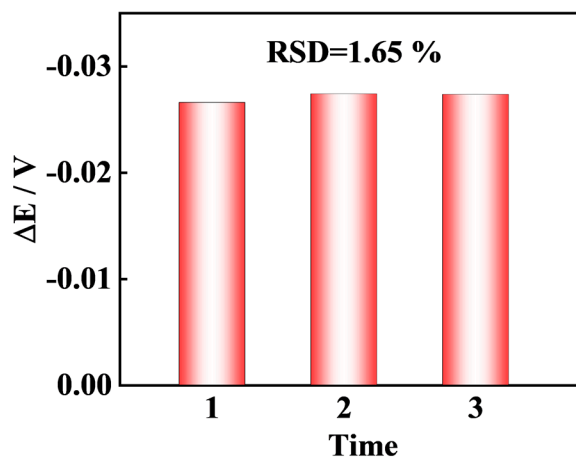

**Figure S4.** Parallel line test diagram of the same Dy-OSCN/FTO electrode for AA determination.

### 1.4 The structural of $[Dy_3(\mu_3-O)_2(\mu_2-O)_3]$

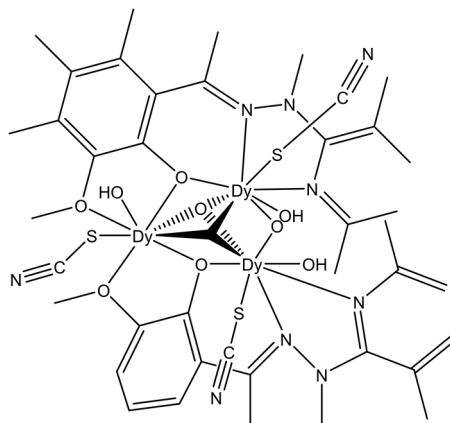

**Figure S5.** The structural of  $[Dy_3(\mu_3-O)_2(\mu_2-O)_3]$

### 1.5 The thermal analysis data of the as-prepared complex

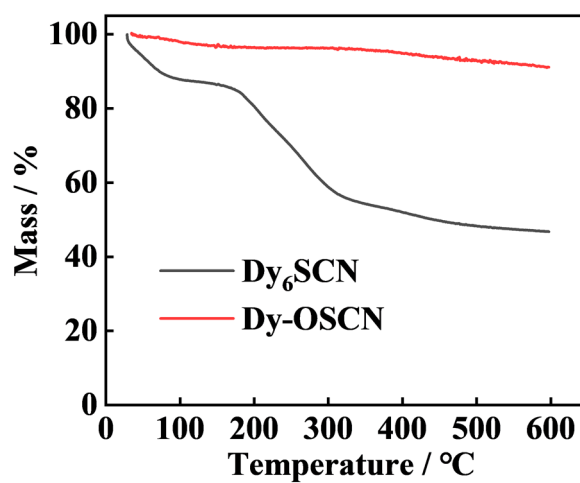

**Figure S6.** Thermogravimetric Analysis of  $\text{Dy}_6\text{SCN}$  and  $\text{Dy-OSCN}$

### 1.6 The thickness of the active layer on the surface of the electrode

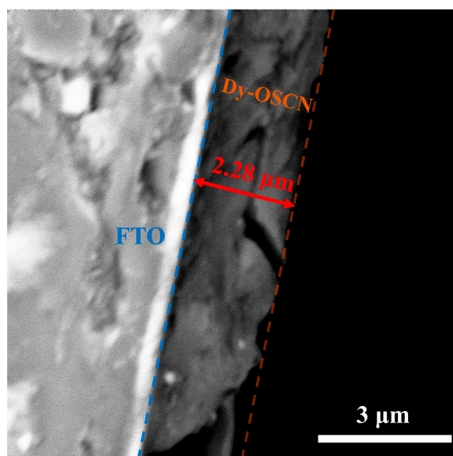

**Figure S7.** The thickness of the active layer on the surface of the electrode
